# Supplementary material for: Global Genome Demethylation Causes Transcription-Associated DNA Double Strand Breaks in HPV-Associated Head and Neck Cancer Cells
Source: Cancers (Basel). 2020 Dec 23;13(1):21. doi: 10.3390/cancers13010021 (PMC7793113; doi:10.3390/cancers13010021)
Supplement: Supplementary file 1 [file cancers-13-00021-s001.pdf]

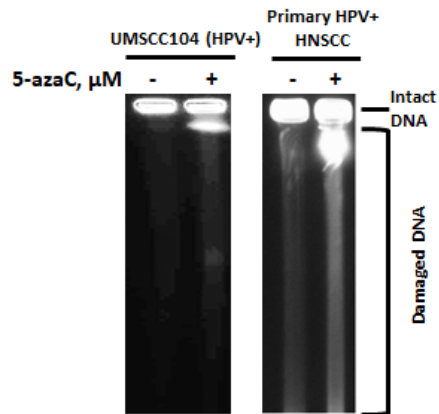

**Figure S1.** PFGE of HPV+ UMSCC104 cells and HPV+ tonsillar cancer cell culture following 72 h of treatment with 5-azaC.

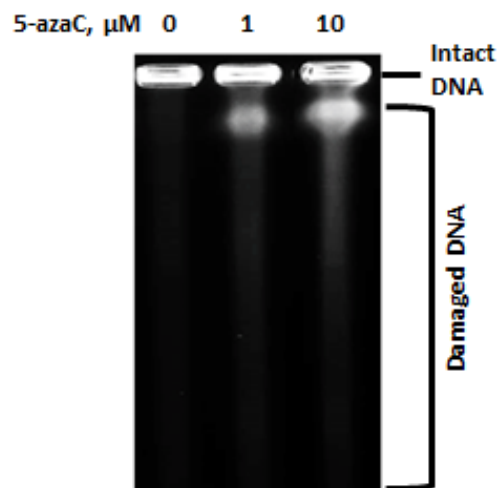

**Figure S2.** PFGE showing HPV+ cell line UMSCC47 after the treatment with 1 or 10  $\mu$ M of 5-azaC daily for 3 days.

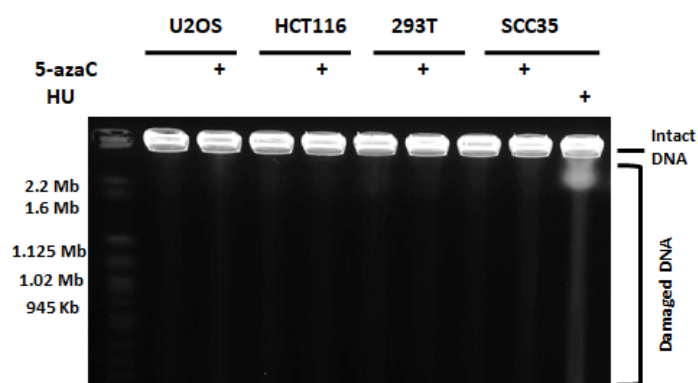

**Figure S3.** PFGE showing HPV-negative cell lines after the treatment with 30  $\mu$ M of 5-azaC or 2mM of HU.

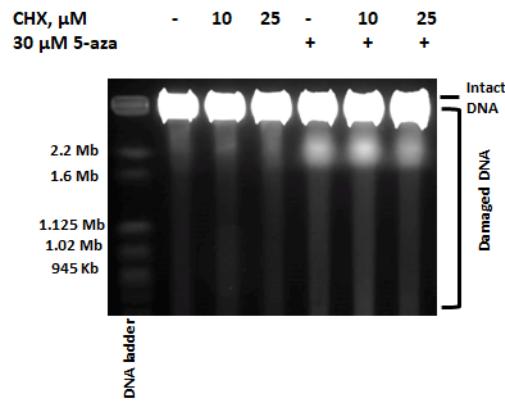

**Figure S4.** 5-azaC-induced DNA DSBs in HPV-positive HNSCC do not depend on protein synthesis (PFGE) showing HPV-positive UMSCC47 cells treated with 20  $\mu$ M of 5-azaC for 72 h with addition of cycloheximide (CHX) where indicated in the last 12 h.

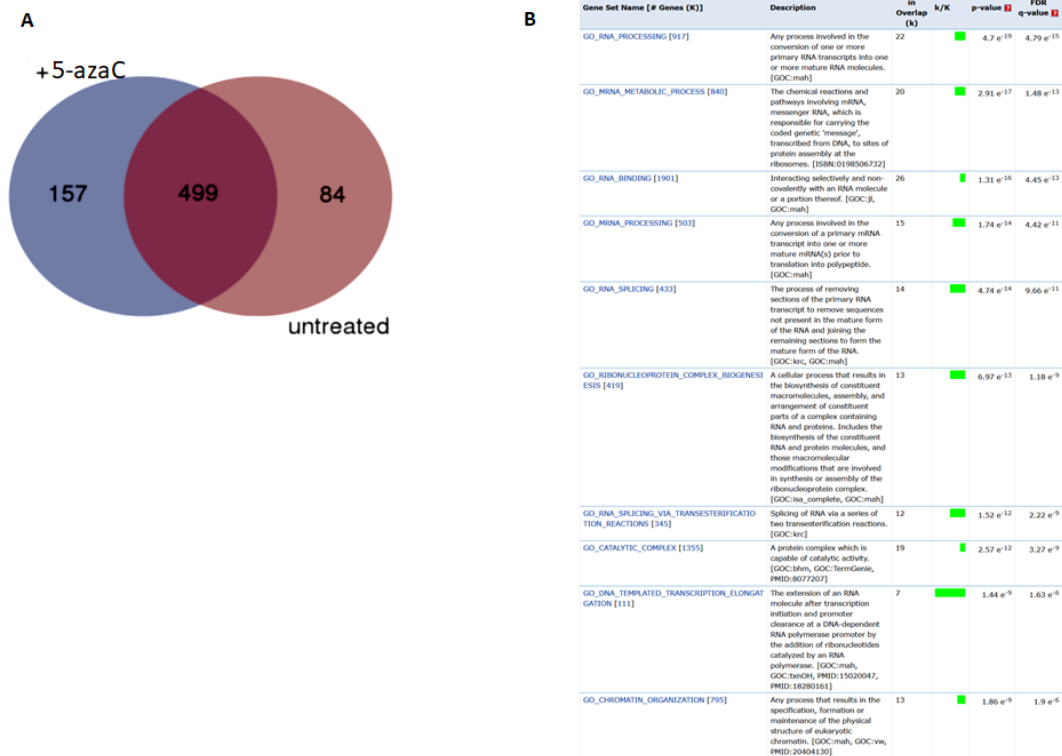

**Figure S5.** (A) Schematic representation of the proteins located on chromatin in HPV+ UMSCC47 cells treated or not with 5-azaC. (B) Gene set enrichment analysis (GSEA) of proteins relocated to chromatin in HPV-positive cells after 5-azaC treatment.

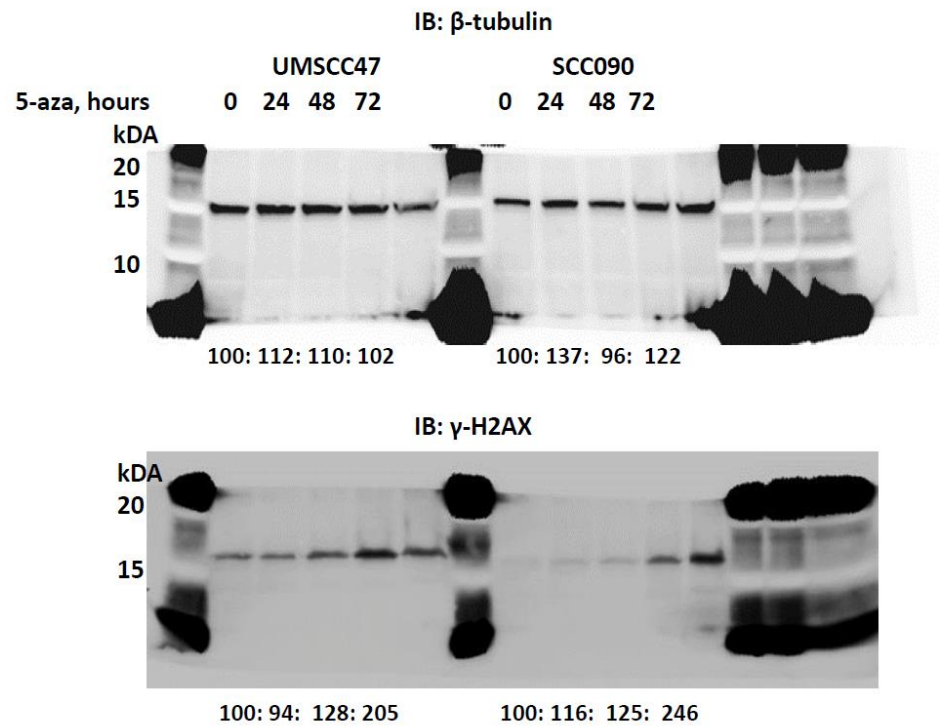

**Figure S6.** The uncropped immunoblotting image of Figure 1A.
